# Supplementary material for: Biotic Factors of Elm Damage in Ukraine
Source: Preprints.org preprint supplement (doi:10.20944/preprints202410.2568.v1), 2024-11-01
Supplement: Supplementary file 1 [file supplementary]

## Sheet: Ulmus in the Forest
Title	Biotic Factors of Elm Damage in Ukraine
Authors	Valentyna Meshkova, Olena Kuznetsova, Oleksandr Borysenko, Volodymyr Korsovetskyi, and Tetiana Pyvovar
Supplement S1		Ulmus sp. spread and health.
Regions	Area with Ulmus,ha	Forest covered area, ha		Percentage,%				%ulmus	U. laevis	U. minor	U. pumila	U. glabra
Crimea	6170.9	278700		2.21417			Luhansk	14.2787	780	26541.5	9402	5027.4
Vinnnytsya	31123.5	346500		8.98225			Poltava	13.3538	6855	21471.8	2068.3	2642.3
Bolyn	2344.6	624600		0.375376			Mykolaiv	10.2135	25.6	923.1	9037.5	43.5
Dnipro	9744.3	179200		5.43767			Cherkasy	9.09937	894.2	24688.4	1683.9	1405.6
Donetsk	8227.1	184100		4.46882			Vinnytsya	8.98225	1937	27331.4	113.7	1741.4
Zhytomyr	3784.3	1001600		0.377825			Sumy	8.37838	1315.5	33251.2	160.3	881.1
Zaporizzya	5543	101000		5.48812			Kirovograd	7.1983	512.7	10619.5	518.3	190.6
Kyiv	23286.5	624100		3.73121			Odesa	6.36067	663.2	6775.6	5377.2	153.4
Kirovograd	11841.2	164500		7.1983			Ternopil	6.23761	0	9922.7	0.7	1503.9
Luhansk	41750.9	292400		14.2787			Zaporizzya	5.48812	702.1	683.3	3604.6	553
Lviv	4447.2	621200		0.715905			Dnipro	5.43767	1146.3	6298.5	3447	231.4
Mykolaiv	10029.7	98200		10.2135			Kharkiv	5.30846	1996.5	17452.9	167.2	465.3
Odesa	12969.4	203900		6.36067			Khmelnizky	4.46929	225.8	10378.3	88	1156
Poltava	33037.4	247400		13.3538			Donetsk	4.46882	308.8	5397.7	2140	380.6
Rivne	4870.3	729300		0.667805			Kherson	4.33388	11.2	322	4478	229.1
Sumz	35608.1	425000		8.37838			Kyiv	3.73121	293.5	21979.2	459.6	554.2
Ternopil	11427.3	183200		6.23761			Crimea	2.21417	708.4	2681.2	1981.5	799.8
Kharkiv	20081.9	378300		5.30846			Zakarpattya	1.30994	53.5	2640.2	107.1	5801.6
Kherson	5040.3	116300		4.33388			Chernihiv	0.773637	1548.5	3046.3	251.3	304
Khmelnytskz	11848.1	265100		4.46929			Lviv	0.715905	63.2	2443.5	29.5	1911
Cherkassi	28672.1	315100		9.09937			Chernivtsi	0.707731	18.7	1497.2	31.8	127.5
Chernihiv	5150.1	665700		0.773637			Rivne	0.667805	51.4	4609.9	11.4	197.6
Zakarpattya	8602.4	656700		1.30994			Iv. Frankivsk	0.505166	26.1	1814.7	55.6	988.1
Iv.Frankivsk	2884.5	571000		0.505166			Zhytomyr	0.377825	99.2	3140	68.9	476.2
Chernivtsi	1675.2	236700		0.707731			Volyn	0.375376	9.6	2263.1	6.9	65
	340160	9.5098e+06		3.57694
